# Supplementary material for: Knowledge, Attitude, and Practice of E-Cigarettes of Adolescents and Adults in Saudi Arabia: A Cross-Sectional Study
Source: MDPI journal article supplement (doi:10.3390/healthcare11222998), 2023-11-20
Supplement: s1 [file s1]

## **E-cigarettes manuscript Supplementary File**

### **E-cigarettes related knowledge, attitude & practice among adolescents and adults in Saudi Arabia in 2021- Study Questionnaire**

#### **Personal data:**

1- **Age** (in years)

2- **Gender**

A- Male

B- Female

3- **Level of education**

A- Postgraduate

B- University

C- School

4- **Income**

A- Enough and exceed needs

B- Enough

C- Not enough

D- Not enough and borrow

5- **Where are you from?**

A- Riyadh

B- Outside Riyadh

please specify

6- **Do you currently smoke?**

A- Yes

B- No

C- Quit/quitting smoking

7- **Where have you heard of E-cigarettes?**

A- Friends

B- TV

C- Social media

D- Family

E- University/school

F- Doctors

G- Center for smoking cessation

8- **Do you have a family member or relative who use E-cigarettes?**

A. Yes

B. No

**Knowledge:****9. What do you think about the following statements?**

| No. | Statements                                                                                       | True | False | I do not know |
|-----|--------------------------------------------------------------------------------------------------|------|-------|---------------|
| 1)  | E- cigarettes are approved by Saudi food and drug authority                                      |      |       |               |
| 2)  | Swallowing the liquid in E-cigarettes accidentally can cause poisoning that is potentially fatal |      |       |               |
| 3)  | E-cigarettes are not associated with lung cancer                                                 |      |       |               |
| 4)  | E-cigarettes are associated with bladder cancer                                                  |      |       |               |
| 5)  | E-cigarettes impair lung and heart function                                                      |      |       |               |
| 6)  | E-cigarettes vapor has an effect on fetal development                                            |      |       |               |
| 7)  | Harmful flavorings and toxins are found in E-cigarettes aerosol                                  |      |       |               |
| 8)  | E-cigarettes are harmless                                                                        |      |       |               |
| 9)  | E-cigarettes are addictive                                                                       |      |       |               |
| 10) | E-cigarettes has less side-effects than regular cigarettes                                       |      |       |               |
| 11) | E-cigarettes carcinogenic component is less than the regular cigarettes                          |      |       |               |
| 12) | E-cigarettes are suitable for pregnant women                                                     |      |       |               |
| 13) | E-cigarettes are suitable for children                                                           |      |       |               |
| 14) | E-cigarettes vapor affect people surrounding the smoker                                          |      |       |               |

**Attitude:****10. What do you think about the following statements?**

| No. | Statements                                                                          | Strongly agree | Agree | Neutral | Disagree | Strongly disagree |
|-----|-------------------------------------------------------------------------------------|----------------|-------|---------|----------|-------------------|
| 1)  | The use of e-cigarette should be allowed in all places                              |                |       |         |          |                   |
| 2)  | A person who uses E-cigarettes should be considered as a non-smoker                 |                |       |         |          |                   |
| 3)  | E-cigarettes should be recommended to a nonsmoker who wants to try safe smoking     |                |       |         |          |                   |
| 4)  | The government should restrict the use of E-cigarettes                              |                |       |         |          |                   |
| 5)  | e-cigarettes are not embarrassing like regular smoking                              |                |       |         |          |                   |
| 6)  | Women and girls can use e-cigarettes                                                |                |       |         |          |                   |
| 7)  | Smoking e-cigarette makes people “fit in” and feel “cool”                           |                |       |         |          |                   |
| 8)  | It is socially acceptable to smoke E-cigarettes, compared to traditional cigarettes |                |       |         |          |                   |
| 9)  | E-cigarettes should be used as a replacement for regular cigarettes                 |                |       |         |          |                   |
| 10) | It is acceptable to experiment with E-cigarettes for pleasure                       |                |       |         |          |                   |
| 11) | E-cigarettes can help people cut down on cigarettes or quit smoking                 |                |       |         |          |                   |
| 12) | I have no problem to try e-cig if offered by a friend                               |                |       |         |          |                   |

**Practice:**

**11. Do you currently use E-cigarettes?**

- A. Yes
- B. No

If yes,

1- How long have you been using E-cigarettes?

12. How frequently do use e- cigarettes?

- A- Daily
- B- Not daily
- C- Do not know

2- What percentage of nicotine do you usually use in your e-cigarettes?

- A- I don't know
- B- No nicotine
- C- 2%
- D- 5%
- E- Other, please specify

3- Which of the e-cigarette flavors do you use?

- A- Coffee flavor
- B- Mint flavor
- C- Fruit flavor
- D- Mixed flavors
- E- No flavor
- F- Other, please specify

4- What made you start using E-cigarettes?

|   | Reasons                                       | Yes | No |
|---|-----------------------------------------------|-----|----|
| A | Better taste than regular cigarettes          |     |    |
| B | Social smoking (with friends or family)       |     |    |
| C | Stress                                        |     |    |
| D | Depression                                    |     |    |
| E | Peer pressure                                 |     |    |
| F | To quit smoking of regular cigarettes         |     |    |
| G | Believe its healthier than regular cigarettes |     |    |
| H | To follow a trend                             |     |    |
| I | Entertainment effect (relaxant, etc..)        |     |    |
| J | Cheaper than regular cigarettes               |     |    |

Other reason, please specify

5- Have you experienced any of the following symptoms after using the E-cigarettes?

|    | Symptoms                                 | Yes | No |
|----|------------------------------------------|-----|----|
| A. | Bad breath                               |     |    |
| B. | Change in your gums                      |     |    |
| C. | Loss of teeth/change in your teeth color |     |    |
| D. | Change in your voice                     |     |    |
| E. | headaches                                |     |    |

6- How is your E-cigarettes use frequency during COVID-19 pandemic?

- A- I started using e-cigarettes during the pandemic
- B- Same as before the pandemic
- C- Increased frequency during the pandemic
- D- Decreased frequency during the pandemic
- E- I did not use E-cigarettes during the pandemic

**12. What do you think the reasons for start using/increase in frequency of e-cigarettes use during the COVID-19 pandemic?**

- A- Stress
- B- Depression
- C- Loneliness
- D- Anxiety
- E- Reduced activities
- F- For entertainment purposes
- F- Other, please specify

**13. What do you think the reasons for stop using/decrease in frequency of e-cigarettes use during the COVID-19 pandemic?**

- A- Financial reasons
- B- Fear of COVID-19 complications in case got infected
- C- Avoid side effect
- D- Prefer to use it with friends
- G- Other, please specify

**14. Would you ever promote or recommend the use of E-cigarettes to other people if you got the chance to?**

- A- Yes
- B- No
- C- I do not know
